# Supplementary material for: Accelerated nature-based mitigation can re-open the window to 1.5°C
Source: Research Square preprint supplement (doi:10.21203/rs.3.rs-6164097/v1), 2025-04-22
Supplement: Supplementary file 1 [file 78decc82428acb4165ad2da8.xlsx]

## Sheet: Data S1 Historical
			FOLU		Ag		AFOLU		Source	Period
		Units	value	rounded	value	rounded	value	rounded
	CO2 (net)	GtCO2	4.67107	4.5	0	0	4.67107	4.5	Friedlingstein 2023	2013-2022
	CO2 gross emissions	GtCO2	13.375	13.5	0	0	13.375	13.5	Friedlingstein 2023	2013-2022
	CO2 gross removals	GtCO2	-8.70391	-9	0	0	-8.70391	-9	Friedlingstein 2023	2013-2022
	CH4	GtCO2e	0.394059	na	3.18829	na	3.58235	na	Forster 2023 and	2012-2021
	N2O	GtCO2e	0.0775385	na	1.86092	na	1.93846	na	AR6 WGIII Ch7 7.1	2012-2021
	Total nonCO2	GtCO2e	0.471597	0.5	5.04922	5	5.52081	5.5	Calculated	2012-2021
	Total net emissions	GtCO2e	5.14266	5	5.04922	5	10.1919	10	Calculated	mix
	Total gross emissions	GtCO2e	13.8466	14	5.04922	5	18.8958	19	Calculated	mix
	Total removals	GtCO2e	-8.70391	-9	0	0	-8.70391	-9	Calculated	mix

## Sheet: Data S2 Baselines
All values are MtCO2e per year
			Roe et al 2021 Origional Data		Baseline Adjusted Version 1		Baseline Adjusted Version 2		Baseline Adjusted - Average
Mitigation classification	Mitigation measure		Potential Annual Technical	Potential Annual Cost Effective	Potential Annual Technical	Potential Annual Cost Effective	Potential Annual Technical	Potential Annual Cost Effective	Potential Annual Technical	Potential Annual Cost Effective
Forests & other ecosystems - Protect	Reduce deforestation	Average	5994	3555.9	4890	2457.6			4890	2457.6
		Busch	8533.9	5267.2	6371.1	3104.4			6371.1	3104.4
		Austin	3287.6	1791.6	3271.3	1775.3			3271.3	1775.3
Forests & other ecosystems - Protect	Reduce mangrove loss		73.3	66	73.3	66			73.3	66
Forests & other ecosystems - Protect	Reduce peatland degradation and conversion		433.5	205.4	344.5	116.4			344.5	116.4
Forests & other ecosystems - Protect	Total (Protect)		6500.8	3827.3	5307.8	2640			5307.8	2640
Forests & other ecosystems - Manage	Forest management	Average	1830	903.2	1825.9	898.9			1825.9	898.9
		Griscom	1373	931.9	1373	931.9			1373	931.9
		Austin	2287	874.1	2278.8	866			2278.8	866
Forests & other ecosystems - Manage	Grassland and savanna fire mgmt		104.3	31.3	104.3	31.3			104.3	31.3
Forests & other ecosystems - Manage	Total (Manage)		1934.3	934.5	1930.2	930.2			1930.2	930.2
Forests & other ecosystems - Restore	Afforestation and reforestation	Average	8455.7	1205.7	9234.9	1985.1			9234.9	1985.1
		Busch	8300.6	1104.8	9870.4	2674.6			9870.4	2674.6
		Austin	6164.8	974.9	6156.6	966.8			6156.6	966.8
Forests & other ecosystems - Restore	Coastal wetland (mangrove) restoration		19.1	5.7	19.1	5.7			19.1	5.7
Forests & other ecosystems - Restore	Peatland restoration		1310.1	593.9	1310.1	593.9			1310.1	593.9
Forests & other ecosystems - Restore	Total (Restore)		9784.9	1805.3	10564.1	2584.8			10564.1	2584.8
	Total (Forests & ecosystems)		18219.9	6567.1	17802.1	6154.9			17802.1	6154.9
Agriculture - Sequester carbon	Soil carbon croplands		1024.6	922.1	1024.6	922.1			1024.6	922.1
Agriculture - Sequester carbon	Soil carbon grasslands		1487.5	892.5	1487.5	892.5			1487.5	892.5
Agriculture - Sequester carbon	Agroforestry		5605.6	1121.1	5605.6	1121.1			5605.6	1121.1
Agriculture - Sequester carbon	Biochar		2364.3	1815.1	2364.3	1815.1			2364.3	1815.1
Agriculture - Sequester carbon	Total (Ag sequester carbon)		10482	4750.8	10482	4750.8			10482	4750.8
Agriculture - Reduce emissions	Enteric fermentation		179.6	98.2	81.4	0	-51.3	-132.7	15	-66.3
Agriculture - Reduce emissions	Manure management		118.2	91.8	26.4	0	94.4	68	60.4	34
Agriculture - Reduce emissions	Nutrient management	Average	255.2	222.6	32.6	0	-284.9	-316.4	-126.1	-158.2
		Griscom	454.3	408.9	45.4	0	-363.4	-408.9	-159	-204.4
		Beach	48.6	31.2	17.3	0	-190	-207.4	-86.3	-103.7
Agriculture - Reduce emissions	Rice cultivation	Average	243.6	171.1	227.3	188.6	221.4	182.7	224.3	185.7
		Griscom	265	159	NA	NA	NA	NA	NA	NA
		Beach	221.4	182.7	226.7	188	221.4	182.7	224	185.3
Agriculture - Reduce emissions	Total (Ag reduce emissions)		796.6	583.7	367.7	188.6	-20.4	-198.4	173.6	-4.9
	Total (Agriculture)		11278.7	5334.6	10849.7	4939.4	10461.6	4552.4	10655.7	4745.9
	Total (All supply side)		29498.6	11901.7	28651.8	11094.4	28263.7	10707.4	28457.8	10900.9
Demand-side	Food waste		865.9	452.5	732.9	336.6	599.9	220.8	666.4	278.7
Demand-side	Healthy diets		2277.5	1433.5	1927.7	1066.5	1577.8	699.5	1752.8	883
Demand-side	Clean cookstoves		352	105.6	352	105.6	352	105.6	352	105.6
Demand-side	Total (Food waste + Healthy Diets)		3143.4	1886	2660.5	1403.2	2177.7	920.3	2419.1	1161.7
Bioenergy - BECCS	BECCS		2390.5	499.2	2390.5	499.2			2390.5	499.2
	Total (All - supply and demand)		32642	13787.6	31312.4	12497.5	30441.4	11627.7	30876.9	12062.6
Sources:
Roe	S. Roe, C. Streck, R. Beach, J. Busch, M. Chapman, V. Daioglou, A. Deppermann, J. Doelman, J. Emmet‐Booth, J. Engelmann, D. Lawrence. Land‐based measures to mitigate climate change: Potential and feasibility by country. Global Change Biology, 27(23), 6025-6058 (2021).
Busch	J. Busch, J. Engelmann, S. C. Cook-Patton, B. W. Griscom, T. Kroeger, H. Possingham, P. Shyamsundar. Potential for low-cost carbon dioxide removal through tropical reforestation. Nature Climate Change, 9(6), 463-466 (2019)
Austin	K. G. Austin, J. S. Baker, B. L. Sohngen, C. M. Wade, A. Daigneault, S. B. Ohrel, S. Ragnauth, A. Bean. The economic costs of planting, preserving, and managing the world’s forests to mitigate climate change. Nature Communications, 11(1), 5946 (2020).
Griscom	B. W. Griscom, J. Adams, P. W. Ellis, R. A. Houghton, G. Lomax, D. A. Miteva, W. H. Schlesinger, D. Shoch, J. V. Siikamäki, P. Smith, P. Woodbury, … J. Fargione. Natural climate solutions. Proceedings of the National Academy of Sciences, 114(44), 11645-11650 (2017).
Beach	USEPA. Global non-CO2 greenhouse gas emission projections & mitigation 2015-2020 (EPA-430-R-19-010). USEPA. https://www.epa.gov/sites/production/files/2019-09/documents/epa_non-co2_greenhouse_gases_rpt-epa430r19010.pdf (2019).

## Sheet: Data S3 Crosswalk
AFOLU mitigation crosswalk
			Protect	Restore	Restore	Manage	Manage	Manage	Manage	Manage	Excluded
			Supply	Supply	Supply	Supply	Supply	Supply	Supply	Demand
			Emission reduction	Enhanced sequestration	Emission reduction	Enhanced sequestration	Emission reduction	Enhanced sequestration	Emission reduction	Emission reduction
			CO2	CO2	CO2	CO2	CO2	CO2	nonCO2	nonCO2
Mitigation classification	Mitigation measure	Adjusted Potential Annual Cost Effective	FOLU	FOLU	FOLU	FOLU	FOLU	Ag	Ag	Ag
Forests & other ecosystems - Protect	Reduce deforestation	2.46	1	0	0	0	0	0	0	0	0
Forests & other ecosystems - Protect	Reduce mangrove loss	0.07	1	0	0	0	0	0	0	0	0
Forests & other ecosystems - Protect	Reduce peatland degradation and conversion	0.12	1	0	0	0	0	0	0	0	0
Forests & other ecosystems - Restore	Afforestation and reforestation	1.99	0	1	0	0	0	0	0	0	0
Forests & other ecosystems - Restore	Coastal wetland (mangrove) restoration	0.01	0	1	0	0	0	0	0	0	0
Forests & other ecosystems - Restore	Peatland restoration	0.59	0	0	1	0	0	0	0	0	0
Forests & other ecosystems - Manage	Forest management	0.9	0	0	0	0.5	0.5	0	0	0	0
Agriculture - Sequester carbon	Soil carbon croplands	0.92	0	0	0	0	0	1	0	0	0
Agriculture - Sequester carbon	Soil carbon grasslands	0.89	0	0	0	0	0	1	0	0	0
Agriculture - Sequester carbon	Biochar	1.82	0	0	0	0	0	1	0	0	0
Agriculture - Sequester carbon	Agroforestry	1.12	0	0	0	0	0	1	0	0	0
Agriculture - Reduce emissions	Enteric fermentation	-0.07	0	0	0	0	0	0	1	0	0
Agriculture - Reduce emissions	Manure management	0.03	0	0	0	0	0	0	1	0	0
Agriculture - Reduce emissions	Nutrient management	-0.16	0	0	0	0	0	0	1	0	0
Agriculture - Reduce emissions	Rice cultivation	0.19	0	0	0	0	0	0	1	0	0
Forests & other ecosystems - Manage	Grassland and savanna fire mgmt	0.03	0	0	0	0	0	0	1	0	0
Demand-side	Food waste	0.28	0	0	0	0	0	0	0	1	0
Demand-side	Healthy diets	0.88	0	0	0	0	0	0	0	1	0
Demand-side	Clean cookstoves	0.11	0	0	0	0	0	0	0	0	1
Bioenergy - BECCS	BECCS	0.5	0	0	0	0	0	0	0	0	1
	Adj Cost Eff Avg 2020-2050	12.06	2.64	1.99	0.59	0.45	0.45	4.75	0.03	1.16	0.6
	Adj Tech Pot Avg 2020-2050		5.31	9.25	1.31	0.91	0.91	10.48	0.28	2.42	2.74
	Cumulative mitigation 2020-2050	361.88	79.2	59.73	17.82	13.48	13.48	142.52	0.79	34.85	18.14

## Sheet: Data S4 PMR
Mitigation curves
	Protect	Restore	Restore	Manage	Manage	Manage	Manage	Manage
	Supply	Supply	Supply	Supply	Supply	Supply	Supply	Demand
	Emission reduction	Enhanced sequestration	Emission reduction	Enhanced sequestration	Emission reduction	Enhanced sequestration	Emission reduction	Emission reduction
	CO2	CO2	CO2	CO2	CO2	CO2	nonCO2	nonCO2
Year	FOLU	FOLU	FOLU	FOLU	FOLU	Ag	Ag	Ag	Protect	Manage	Restore	Demand	Emission reduction, nonCO2	Emission reduction, CO2	Enhanced sequestration, CO2	FOLU	Ag	Total
2023	0	0	0	0	0	0	0	0	0	0	0	0	0	0	0	0	0	0
2024	0.6	0.2	0.03	0.04	0.03	0.17	0	0.05	0.6	0.24	0.22	0.05	0.05	0.66	0.41	0.9	0.22	1.12
2025	1.11	0.4	0.05	0.09	0.06	0.34	0	0.09	1.11	0.49	0.45	0.09	0.1	1.23	0.82	1.71	0.43	2.15
2026	1.55	0.65	0.09	0.18	0.12	0.68	0.01	0.19	1.55	0.98	0.74	0.19	0.19	1.76	1.5	2.59	0.87	3.46
2027	1.93	0.93	0.13	0.34	0.22	1.27	0.01	0.35	1.93	1.84	1.06	0.35	0.37	2.28	2.54	3.55	1.63	5.19
2028	2.25	1.25	0.17	0.49	0.33	1.86	0.02	0.52	2.25	2.7	1.42	0.52	0.54	2.75	3.6	4.49	2.4	6.89
2029	2.52	1.61	0.22	0.63	0.42	2.38	0.02	0.67	2.52	3.46	1.83	0.67	0.69	3.17	4.62	5.41	3.07	8.48
2030	2.76	1.98	0.27	0.72	0.48	2.7	0.02	0.75	2.76	3.92	2.25	0.75	0.78	3.51	5.39	6.2	3.48	9.68
2031	2.89	2.27	0.33	0.76	0.5	2.89	0.02	0.81	2.89	4.17	2.6	0.81	0.83	3.72	5.92	6.75	3.72	10.47
2032	2.99	2.52	0.39	0.79	0.53	3.04	0.02	0.86	2.99	4.38	2.91	0.86	0.89	3.91	6.35	7.22	3.92	11.15
2033	3.07	2.7	0.46	0.82	0.55	3.16	0.02	0.91	3.07	4.55	3.16	0.91	0.94	4.08	6.68	7.59	4.1	11.7
2034	3.12	2.83	0.53	0.84	0.56	3.27	0.02	0.97	3.12	4.7	3.36	0.97	0.99	4.22	6.95	7.9	4.26	12.16
2035	3.16	2.95	0.6	0.87	0.58	3.36	0.03	1.02	3.16	4.83	3.55	1.02	1.04	4.34	7.18	8.15	4.41	12.56
2036	3.19	3.05	0.67	0.88	0.59	3.43	0.03	1.07	3.19	4.93	3.72	1.07	1.1	4.44	7.36	8.37	4.53	12.9
2037	3.21	3.14	0.73	0.9	0.6	3.51	0.03	1.12	3.21	5.02	3.87	1.12	1.15	4.53	7.54	8.57	4.65	13.22
2038	3.23	3.23	0.79	0.91	0.61	3.58	0.03	1.17	3.23	5.12	4.02	1.17	1.19	4.63	7.71	8.77	4.77	13.54
2039	3.25	3.31	0.85	0.92	0.62	3.65	0.03	1.21	3.25	5.22	4.15	1.21	1.24	4.72	7.88	8.95	4.89	13.84
2040	3.28	3.39	0.9	0.94	0.63	3.72	0.03	1.26	3.28	5.31	4.29	1.26	1.28	4.8	8.05	9.13	5	14.14
2041	3.29	3.48	0.95	0.95	0.64	3.79	0.03	1.3	3.29	5.41	4.42	1.3	1.33	4.88	8.22	9.31	5.12	14.42
2042	3.31	3.55	0.99	0.97	0.65	3.86	0.03	1.34	3.31	5.5	4.55	1.34	1.36	4.95	8.39	9.47	5.23	14.7
2043	3.33	3.63	1.03	0.98	0.66	3.93	0.03	1.37	3.33	5.6	4.66	1.37	1.4	5.02	8.54	9.63	5.33	14.96
2044	3.35	3.69	1.07	1	0.67	4.01	0.03	1.4	3.35	5.7	4.76	1.4	1.43	5.08	8.7	9.77	5.44	15.21
2045	3.36	3.75	1.1	1.01	0.68	4.08	0.03	1.43	3.36	5.79	4.85	1.43	1.46	5.14	8.84	9.9	5.54	15.44
2046	3.38	3.8	1.13	1.03	0.69	4.15	0.03	1.46	3.38	5.89	4.93	1.46	1.48	5.19	8.98	10.02	5.63	15.65
2047	3.4	3.85	1.15	1.04	0.7	4.22	0.03	1.48	3.4	5.99	5	1.48	1.5	5.24	9.11	10.13	5.72	15.86
2048	3.41	3.88	1.17	1.06	0.71	4.29	0.03	1.49	3.41	6.08	5.05	1.49	1.52	5.29	9.23	10.23	5.81	16.04
2049	3.43	3.92	1.19	1.07	0.72	4.36	0.03	1.5	3.43	6.18	5.1	1.5	1.53	5.33	9.35	10.32	5.89	16.22
2050	3.45	3.95	1.2	1.07	0.72	4.43	0.03	1.51	3.45	6.25	5.15	1.51	1.54	5.37	9.46	10.39	5.97	16.36
27yr avg	2.88	2.74	0.67	0.79	0.53	3.38	0.02	1.01	2.88	4.72	3.41	1.01	1.03	4.08	6.91	7.61	4.41	12.02
2024-2050 cumulative	77.84	73.9	18.17	21.33	14.22	91.23	0.61	27.3	77.84	127.38	92.07	27.3	27.91	110.23	186.45	205.46	119.14	324.59
